# Supplementary material for: Peripheral Nerve Ultrasound for the Differentiation between ALS, Inflammatory, and Hereditary Polyneuropathies
Source: MDPI journal article supplement (doi:10.3390/medicina59071192), 2023-06-24
Supplement: s1 [file s1]

**Table S1.** Correlation and comparison between ultrasound measurements in the entire cohort.

| Total cohort ( <i>n</i> = 36)                                     | Correlation                      | <i>p</i> -value                        |
|-------------------------------------------------------------------|----------------------------------|----------------------------------------|
| CSA tibial nerve left –<br>CSA tibial nerve right                 | 0.912<br>( <i>&lt; 0.001</i> )** | <i>Z</i> = -1.440;<br><i>p</i> = 0.150 |
| Microvascular blood flow left –<br>Microvascular blood flow right | 0.540<br>( <i>&lt; 0.001</i> )** | <i>Z</i> = -1.645;<br><i>p</i> = 0.100 |
| CSA tibial nerves –<br>Microvascular blood flow                   | 0.375<br>(0.024)**               | ---                                    |

Data presented as Spearman's rank correlation coefficient (*rho*) (*p*-value), \*\**p*-value considered significant after Bonferroni adjustment (ie, *p* ≤ 0.05 / 2 = 0.025). CSA, Cross sectional area.

**Table S2.** Correlation and comparison between nerve conduction study – tibial nerve.

|                                                           | CIDP ( <i>n</i> = 5)             |                                           | CMT ( <i>n</i> = 5)              |                                            |
|-----------------------------------------------------------|----------------------------------|-------------------------------------------|----------------------------------|--------------------------------------------|
|                                                           | Correlation                      | <i>p</i> -value                           | Correlation                      | <i>p</i> -value                            |
| CMAP ankle left–<br>CMAP ankle right                      | 1.000<br>( <i>&lt; 0.001</i> )** | <i>Z</i> = -1.604;<br><i>p</i> = 0.109    | 0.900<br>(0.037)                 | <i>Z</i> = -0.944;<br><i>p</i> = 0.354     |
| CMAP popliteal fossa left –<br>CMAP popliteal fossa right | 1.000<br>( <i>&lt; 0.001</i> )** | <i>Z</i> = -1.633;<br><i>p</i> = 0.102    | -0.700<br>(0.188)                | <i>Z</i> = -0.135;<br><i>p</i> = 0.893     |
| NCV left –<br>NCV right                                   | 0.959*<br>(0.010)**              | <i>T</i> (4) = 0.482;<br><i>p</i> = 0.655 | -0.981*<br>(0.003)**             | <i>T</i> (4) = -0.110;<br><i>p</i> = 0.917 |
| CMAP ankle –<br>CMAP popliteal fossa                      | 0.973<br>(0.005)**               | <i>Z</i> = -1.604;<br><i>p</i> = 0.109    | 1.000<br>( <i>&lt; 0.001</i> )** | <i>Z</i> = -2.023;<br><i>p</i> = 0.043     |

Data presented as Spearman's rank correlation coefficient (*rho*) (*p*-value), \*Pearson correlation coefficient (*r*) (*p*-value), \*\**p*-value considered significant after Bonferroni adjustment (ie, *p* ≤ 0.05 / 4 = 0.0125); CIDP, Chronic inflammatory demyelinating polyradiculopathy; CMT, Charcot-Marie-Tooth disease; CMAP, compound muscle action potential; NCV, nerve conduction velocity.

**Table S3.** Subtype ALS comparison ultrasound data.

| US data<br>ALS ( <i>n</i> = 11)      | ALS bulbar<br>( <i>n</i> = 3)     | ALS limbs<br>( <i>n</i> = 8)       | <i>p</i> -value                        |
|--------------------------------------|-----------------------------------|------------------------------------|----------------------------------------|
| CSA<br>(mm <sup>2</sup> )            | 14.06±0.82<br>(13.39-14.97)       | 10.94±3.07<br>(5.82-15.47)         | <i>T</i> (9)=1.681;<br><i>p</i> =0.127 |
| Microvascular blood flow             | 0.0138±0.0131<br>(0.00-0.03)      | 0.0091±0.0092<br>(0.00-0.02)       | <i>T</i> (9)=0.675;<br><i>p</i> =0.516 |
| US data<br>ALS limbs ( <i>n</i> = 8) | ALS lower limb<br>( <i>n</i> = 2) | ALS upper limbs<br>( <i>n</i> = 6) | <i>p</i> -value                        |
| CSA<br>(mm <sup>2</sup> )            | 12.32±4.46<br>(9.16-15.47)        | 10.49±2.67<br>(5.82-13.21)         | <i>T</i> (6)=0.703;<br><i>p</i> =0.508 |
| Microvascular blood flow             | 0.0172±0.0042<br>(0.01-0.02)      | 0.064±0.0090<br>(0.00-0.02)        | <i>U</i> =2.000;<br><i>Z</i> = -1.341; |

p=0.286

Data presented as mean  $\pm$  standard deviation, (range); US, ultrasound; ALS, Amyotrophic lateral sclerosis; CSA, Cross-sectional area. T-test and Mann-Whitney-U-Test were used. Significance was set at  $p \leq 0.05$ .

**Table S4.** Group comparison ultrasound data in CMT 1A.

| US data                     |                                   | ALS ( <i>n</i> = 11)           | CIDP ( <i>n</i> = 5)           |                | CMT 1A ( <i>n</i> = 4)         | CON ( <i>n</i> = 15)           |                   |
|-----------------------------|-----------------------------------|--------------------------------|--------------------------------|----------------|--------------------------------|--------------------------------|-------------------|
| CSA<br>(mm <sup>2</sup> )   |                                   | 11.79 ± 2.97<br>(5.82-15.47)   | 20.97 ± 8.31<br>(9.69-33.05)   |                | 25.00 ± 2.83<br>(20.99-27.52)  | 9.15 ± 2.15<br>(5.61-13.80)    |                   |
| Microvascular blood flow    |                                   | 0.0104 ± 0.0099<br>(0.00-0.03) | 0.0318 ± 0.0246<br>(0.00-0.06) |                | 0.0100 ± 0.0093<br>(0.00-0.02) | 0.0044 ± 0.0037<br>(0.00-0.01) |                   |
| US data                     | <i>p</i> -value<br>(ANOVA)        | ALS vs.<br>CIDP                | ALS vs.<br>CMT 1A              | ALS vs.<br>CON | CIDP vs.<br>CMT 1A             | CIDP vs.<br>CON                | CMT 1A<br>vs. CON |
| CSA<br>(mm <sup>2</sup> )   | F(3) = 25.59;<br><i>p</i> < 0.001 | < 0.001                        | < 0.001                        | 0.554          | 0.759                          | < 0.001                        | < 0.001           |
| Microvascular<br>blood flow | F(3) = 7.592;<br><i>p</i> < 0.001 | 0.007                          | 1.000                          | 1.000          | 0.034                          | < 0.001                        | 1.000             |

Data presented as mean  $\pm$  standard deviation, (range); US, ultrasound; ALS, Amyotrophic lateral sclerosis; CIDP, Chronic inflammatory demyelinating polyradiculopathy; CMT, Charcot-Marie-Tooth disease, CON, Controls; CSA, Cross-sectional area. One-way ANOVA and post-hoc Bonferroni were used. Significance was set at  $p \leq 0.05$ . Significant values are shown in bold.

**Table S5.** Correlation ultrasound data vs. clinical scores in CMT 1A.

| Correlation              | CMT 1A (n = 4)    |                   |                   |                   |
|--------------------------|-------------------|-------------------|-------------------|-------------------|
|                          | CMTNS total       | CMTNS leg score   | MRC-sum-score     | MRC-lower limbs   |
| CSA                      | -0.395<br>(0.605) | -0.111<br>(0.889) | -0.135<br>(0.865) | -0.512<br>(0.488) |
| Microvascular blood flow | 0.233<br>(0.767)  | -0.219<br>(0.781) | -0.250<br>(0.750) | -0.216<br>(0.784) |

Data presented as Pearson correlation coefficient (r) (p-value), \*\*p-value considered significant after Bonferroni adjustment ( $p \leq 0.05 / 8 = 0.00625$ ). CMT, Charcot-Marie-Tooth disease; CSA, Cross-sectional area; MRC-sum-score, Medical research council sum score; CMTNS, CMT-neuropathy score.

**Table S6.** Correlation ultrasound data vs. nerve conduction study – tibial nerve in CMT 1A.

| Correlation              | CMT 1A (n = 4)     |                      |                    |
|--------------------------|--------------------|----------------------|--------------------|
|                          | CMAP ankle         | CMAP popliteal fossa | NCV                |
| CSA                      | 0.204*<br>(0.796)  | 0.400<br>(0.600)     | 0.693*<br>(0.307)  |
| Microvascular blood flow | -0.242*<br>(0.758) | 0.200<br>(0.800)     | -0.669*<br>(0.331) |

Data presented as Spearman's rank correlation coefficient (rho) (*p*-value), \*Pearson correlation coefficient (r) (*p*-value), *p*-value considered significant after Bonferroni adjustment ( $p \leq 0.05 / 6 = 0.008$ ). CMT, Charcot-Marie-Tooth disease; CSA, Cross-sectional area; CMAP, Compound muscle action potential; NCV, Nerve conduction velocity.

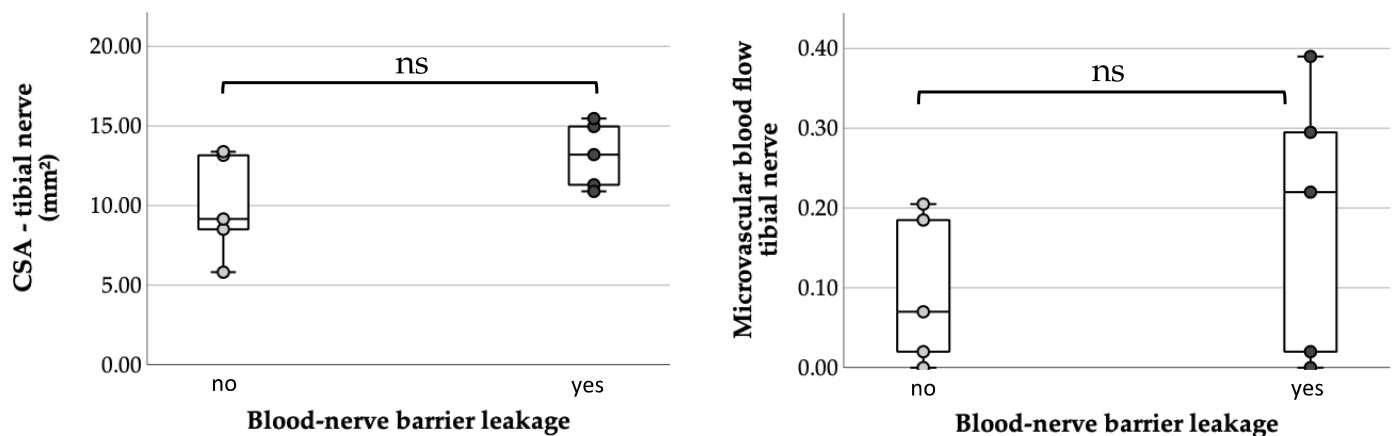

**Figure S1.** Box plots ALS – Blood-nerve barrier leakage.

**A.** Comparison of two ALS subgroups after division into present blood-nerve barrier leakage (yes) and intact blood-nerve barrier (no). The subgroup with blood-nerve barrier leakage shows not significant slightly larger CSA values. **B.** Illustration of microvascular blood flow without significant difference of ALS subgroups with blood-nerve barrier leakage (yes) and intact blood-nerve barrier (no). Median (horizontal bars), 25th to 75th quartile (box), range (whiskers) and single values (dots) are shown, CSA, Cross-sectional area; CSF, cerebral spinal fluid; ns, not significant.

**Table S7.** Subgroup comparison clinical scores – ALS.

| ALS (n = 11)                | ALSFRS/R total                           |                                          |                                               | ALSFRS/R gross-motor                    |                                          |                                       |
|-----------------------------|------------------------------------------|------------------------------------------|-----------------------------------------------|-----------------------------------------|------------------------------------------|---------------------------------------|
|                             | severe<br>(n = 8)                        | mild<br>(n = 3)                          | <i>p</i> -value                               | severe<br>(n = 6)                       | mild<br>(n = 5)                          | <i>p</i> -value                       |
| CSA<br>(mm <sup>2</sup> )   | 11.26 ± 2.82<br>12.24<br>(5.82-13.81)    | 13.20 ± 3.51<br>1.97<br>(9.16-15.47)     | T(9) =<br>-0.958;<br><i>p</i> = 0.363         | 11.11 ± 3.11<br>12.24<br>(5.82-13.81)   | 12.61 ± 2.91<br>13.21<br>(8.52-15.47)    | T(9) =<br>-0.821;<br><i>p</i> = 0.433 |
| Microvascular<br>blood flow | 0.0067 ± 0.0087<br>0.0021<br>(0.00-0.02) | 0.0202 ± 0.0059<br>0.0202<br>(0.01-0.03) | U = 3.000;<br>Z = -1.854;<br><i>p</i> = 0.085 | 0.0082 ± 0.0090<br>0.069<br>(0.00-0.02) | 0.0130 ± 0.0116<br>0.0142<br>(0.00-0.03) | T(9) =<br>-0.777;<br><i>p</i> = 0.457 |

Data presented as mean  $\pm$  standard deviation, median (range). *p*-value considered significant after Bonferroni adjustment (ie,  $p \leq 0.05 / 4 = 0.0125$ ). ALS, Amyotrophic lateral sclerosis; CSA, Cross sectional area; ALSFRS/R, ALS-Functional Rating Scale/revised.

**Table S8.** Subgroup comparison clinical scores – CIDP.

| CIDP<br>( <i>n</i> = 5)         | ONLS total                                   |                                              |                                       | ONLS leg grade scale                         |                                              |                                       |
|---------------------------------|----------------------------------------------|----------------------------------------------|---------------------------------------|----------------------------------------------|----------------------------------------------|---------------------------------------|
|                                 | severe<br>( <i>n</i> = 2)                    | mild<br>( <i>n</i> = 3)                      | <i>p</i> -value                       | severe<br>( <i>n</i> = 2)                    | mild<br>( <i>n</i> = 3)                      | <i>p</i> -value                       |
| CSA<br>(mm <sup>2</sup> )       | 27.50 $\pm$ 7.85<br>27.50<br>(21.95-33.05)   | 16.62 $\pm$ 6.01<br>19.67<br>(9.69-20.49)    | T(3) =<br>-1.785;<br><i>p</i> = 0.172 | 27.50 $\pm$ 7.85<br>27.50<br>(21.95-33.05)   | 16.62 $\pm$ 6.01<br>19.67<br>(9.69-20.49)    | T(3) =<br>-1.785;<br><i>p</i> = 0.172 |
| Microvasc<br>ular blood<br>flow | 0.0241 $\pm$ 0.0342<br>0.0241<br>(0.00-0.05) | 0.0370 $\pm$ 0.0231<br>0.0257<br>(0.02-0.06) | T(3) =<br>0.515;<br><i>p</i> = 0.642  | 0.0241 $\pm$ 0.0342<br>0.0241<br>(0.00-0.05) | 0.0370 $\pm$ 0.0231<br>0.0257<br>(0.02-0.06) | T(3) =<br>0.515;<br><i>p</i> = 0.642  |
| CIDP<br>( <i>n</i> = 5)         | MRC-sum-score                                |                                              |                                       | MRC leg                                      |                                              |                                       |
|                                 | severe<br>( <i>n</i> = 2)                    | mild<br>( <i>n</i> = 3)                      | <i>p</i> -value                       | severe<br>( <i>n</i> = 2)                    | mild<br>( <i>n</i> = 3)                      | <i>p</i> -value                       |
| CSA<br>(mm <sup>2</sup> )       | 27.50 $\pm$ 7.85<br>27.50<br>(21.95-33.05)   | 16.62 $\pm$ 6.01<br>19.67<br>(9.69-20.49)    | T(3) =<br>1.785;<br><i>p</i> = 0.172  | 27.50 $\pm$ 7.85<br>27.50<br>(21.95-33.05)   | 16.62 $\pm$ 6.01<br>19.67<br>(9.69-20.49)    | T(3) =<br>1.785;<br><i>p</i> = 0.172  |
| Microvasc<br>ular blood<br>flow | 0.0241 $\pm$ 0.0342<br>0.0241<br>(0.00-0.05) | 0.0370 $\pm$ 0.0231<br>0.0257<br>(0.02-0.06) | T(3) =<br>-0.515;<br><i>p</i> = 0.642 | 0.0241 $\pm$ 0.0342<br>0.0241<br>(0.00-0.05) | 0.0370 $\pm$ 0.0231<br>0.0257<br>(0.02-0.06) | T(3) =<br>-0.515;<br><i>p</i> = 0.642 |

Data presented as mean  $\pm$  standard deviation, median (range). *p*-value considered significant after Bonferroni adjustment (ie,  $p \leq 0.05 / 8 = 0.00625$ ). CIDP, Chronic inflammatory demyelinating polyradiculopathy; CSA, Cross sectional area; ONLS, Overall neuropathy limitation scale; MRC, Medical research council.

**Table S9.** Subgroup comparison clinical scores – CMT.

| CMT ( <i>n</i> = 5)         | CMTNS total                                  |                                              |                                       | CMTNS leg                                    |                                              |                                         |
|-----------------------------|----------------------------------------------|----------------------------------------------|---------------------------------------|----------------------------------------------|----------------------------------------------|-----------------------------------------|
|                             | severe<br>( <i>n</i> = 2)                    | mild<br>( <i>n</i> = 3)                      | <i>p</i> -value                       | severe<br>( <i>n</i> = 2)                    | mild<br>( <i>n</i> = 3)                      | <i>p</i> -value                         |
| CSA<br>(mm <sup>2</sup> )   | 24.26 $\pm$ 4.62<br>24.26<br>(20.99-27.52)   | 23.07 $\pm$ 4.65<br>25.23<br>(17.73-26.26)   | T(3) =<br>-0.279;<br><i>p</i> = 0.798 | 22.63 $\pm$ 6.92<br>22.63<br>(17.73-27.52)   | 24.16 $\pm$ 2.79<br>25.23<br>(20.99-26.26)   | T(3) =<br>0.365;<br><i>p</i> =<br>0.739 |
| Microvascular<br>blood flow | 0.0081 $\pm$ 0.0037<br>0.0081<br>(0.00-0.01) | 0.0083 $\pm$ 0.0119<br>0.0031<br>(0.00-0.02) | T(3) =<br>0.028;<br><i>p</i> = 0.980  | 0.0043 $\pm$ 0.0017<br>0.0043<br>(0.00-0.01) | 0.0190 $\pm$ 0.0110<br>0.0107<br>(0.00-0.02) | T(3) =<br>0.804;<br><i>p</i> =<br>0.480 |

| CMT ( <i>n</i> = 5)         | MRC-sum-score                            |                                          |                                       | MRC leg                                  |                                          |                                         |
|-----------------------------|------------------------------------------|------------------------------------------|---------------------------------------|------------------------------------------|------------------------------------------|-----------------------------------------|
|                             | severe<br>( <i>n</i> = 3)                | mild<br>( <i>n</i> = 2)                  | <i>p</i> -value                       | severe<br>( <i>n</i> = 3)                | mild<br>( <i>n</i> = 2)                  | <i>p</i> -value                         |
| CSA<br>(mm <sup>2</sup> )   | 22.08 ± 4.99<br>20.99<br>(17.73-27.52)   | 25.74 ± 0.72<br>25.74<br>(25.23-26.26)   | T(3) =<br>-0.981;<br><i>p</i> = 0.399 | 23.84 ± 5.32<br>26.26<br>(17.73-27.52)   | 23.11 ± 3.00<br>23.11<br>(20.99-25.23)   | T(3) =<br>0.170;<br><i>p</i> =<br>0.876 |
| Microvascular<br>blood flow | 0.0064 ± 0.0039<br>0.0055<br>(0.00-0.01) | 0.0110 ± 0.0155<br>0.0110<br>(0.00-0.02) | T(3) =<br>-0.522;<br><i>p</i> = 0.638 | 0.0102 ± 0.0102<br>0.0055<br>(0.00-0.02) | 0.0054 ± 0.0076<br>0.0054<br>(0.00-0.01) | T(3) =<br>0.556;<br><i>p</i> =<br>0.617 |

Data presented as mean ± standard deviation, median (range). *p*-value considered significant after Bonferroni adjustment (ie, *p* ≤ 0.05 / 8 = 0.00625). CMT, Charcot-Marie-Tooth disease; CSA, Cross sectional area; CMTNS, CMT-neuropathy score; MRC, Medical research council.

59  
60  
61  
62  
63  
64
